# Supplementary material
Source: publisher figshare collection journal article supplement (https://acs.figshare.com/ndownloader/files/15123386)
Supplement: Supplementary file 2 [file 15123386]

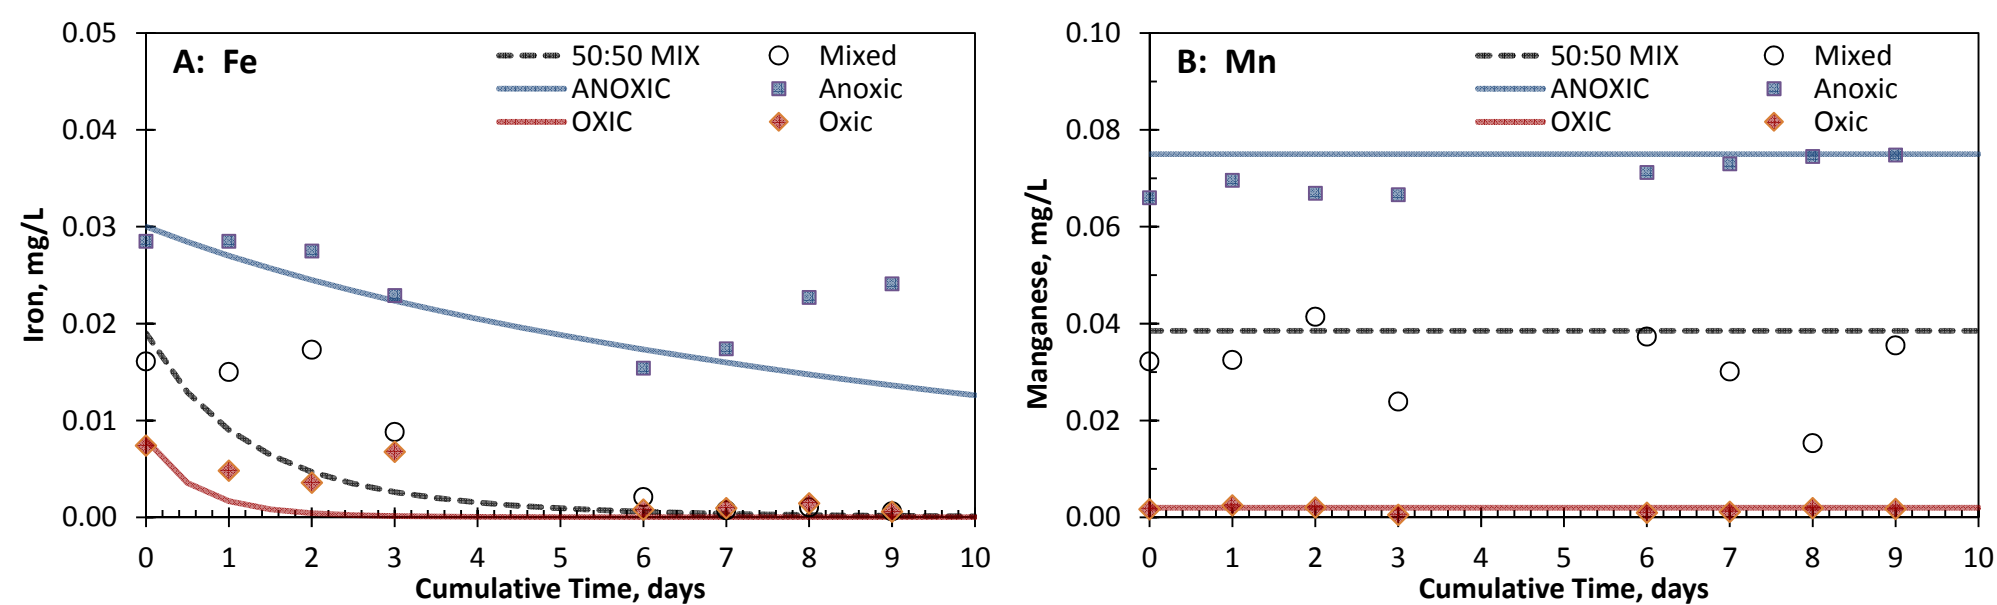

Figure 4: Empirical data (points) and PHREEQC simulation (curves) of chemical changes to anoxic water, oxic water, and 50:50 anoxic:oxic mixture over time. [Samples were collected in glass bottles immersed in a bucket with continuous flow of water from a pump set at relevant depth. For the "mixed" sample, the glass bottle was filled by the two pumps at the same time. Bottles were placed at 20°C and protected from light. Each day, one bottle of each series was sacrificed and measured for pH, O<sub>2</sub>, and concentrations of cations and anions.] [The PHREEQC model considers kinetic and equilibrium speciation reactions with autocatalytic sorbent and bacterial catalysis. Oxidation rates of Fe<sup>II</sup> and Mn<sup>II</sup> include homogeneous and heterogeneous contributions, plus that for Fe<sup>II</sup> also includes microbial catalysis of the heterogeneous process. Homogeneous rates depend on the aqueous metal concentration; heterogeneous rates depend on the adsorbed metal concentration. ]

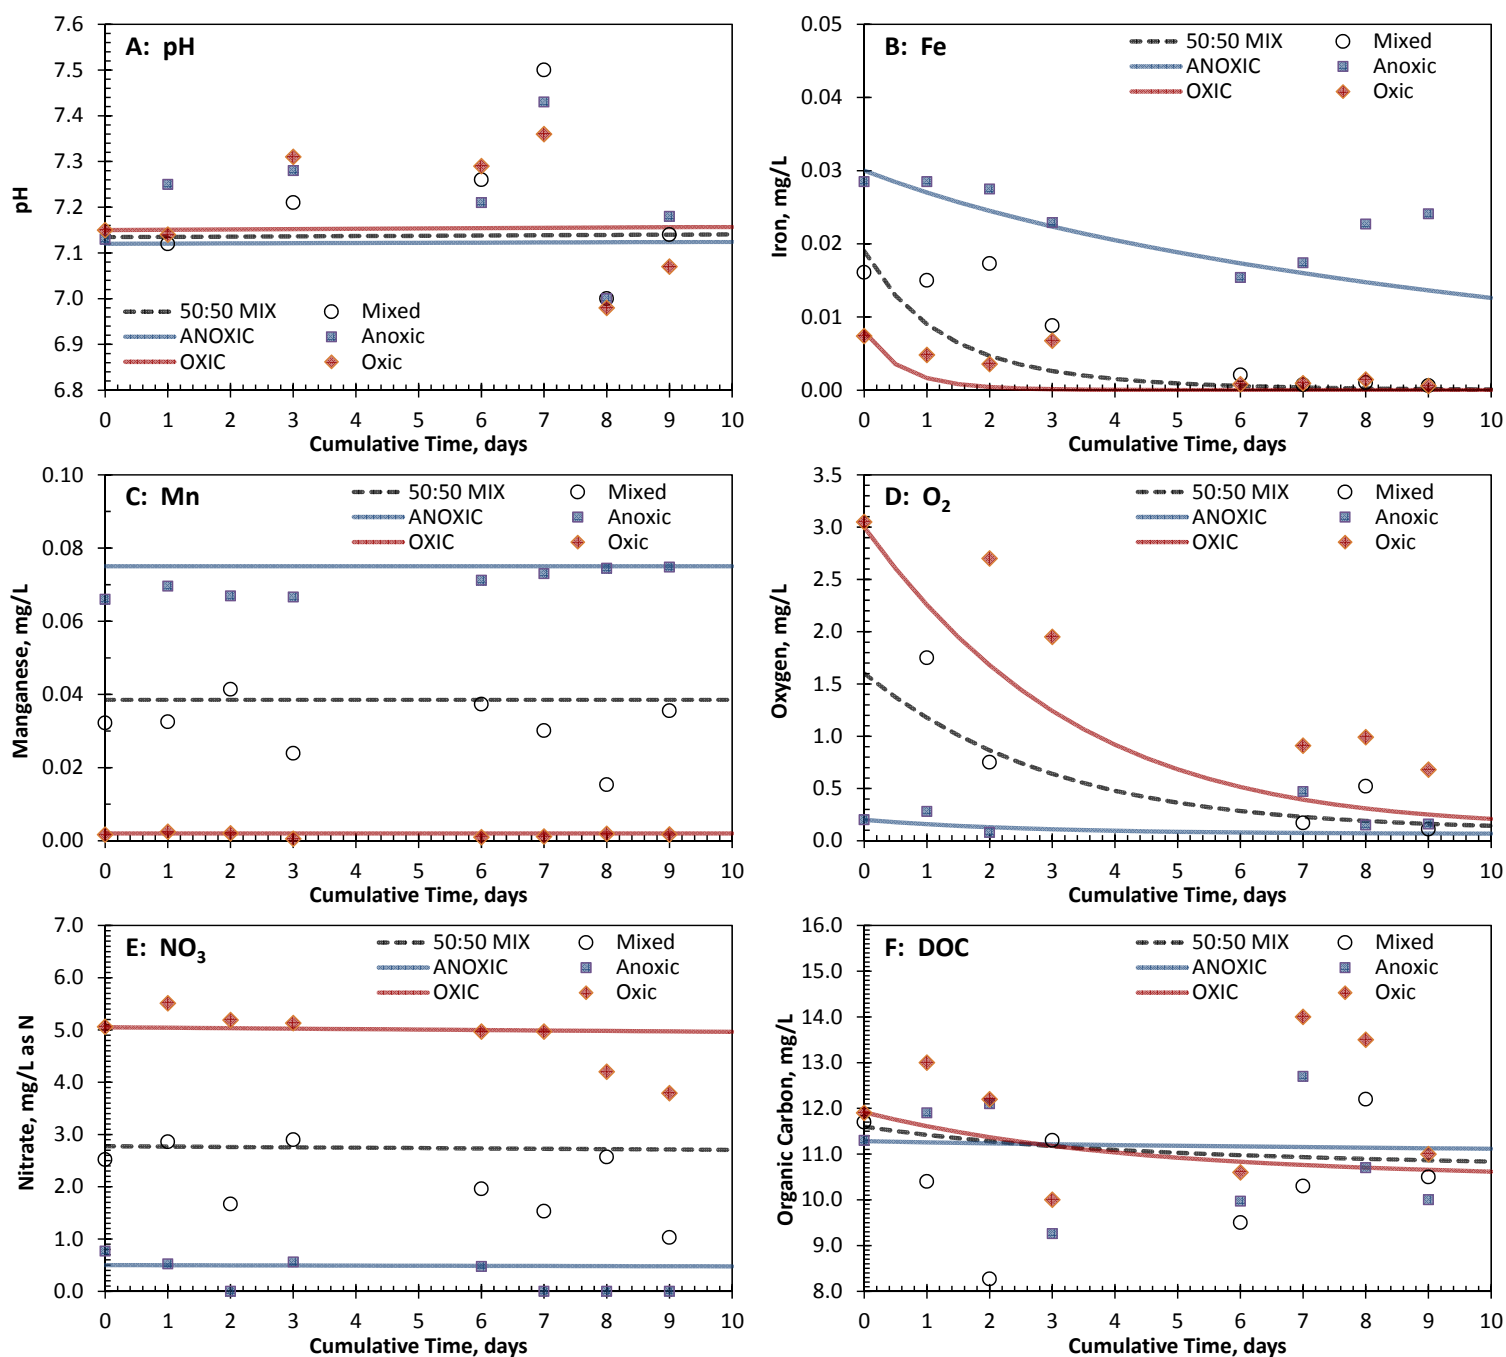

Figure SI.4: Empirical data (points) and PHREEQC simulation (curves) of chemical changes to anoxic water, oxic water, and 50:50 anoxic:oxic mixture over time. [Samples were collected in glass bottles immersed in a bucket with continuous flow of water from a pump set at relevant depth. For the "mixed" sample, the glass bottle was filled by the two pumps at the same time. Bottles were placed at 20°C and protected from light. Each day, one bottle of each series was sacrificed and measured for pH, O<sub>2</sub>, and concentrations of cations and anions.] [The PHREEQC model considers kinetic and equilibrium speciation reactions with autocatalytic sorbent and bacterial catalysis. Oxidation rates of Fe<sup>II</sup> and Mn<sup>II</sup> include homogeneous and heterogeneous contributions, plus that for Fe<sup>II</sup> also includes microbial catalysis of the heterogeneous process. Homogeneous rates depend on the aqueous metal concentration; heterogeneous rates depend on the adsorbed metal concentration.]
