# Supplementary material
Source: publisher figshare collection journal article supplement (https://acs.figshare.com/ndownloader/files/15123386)

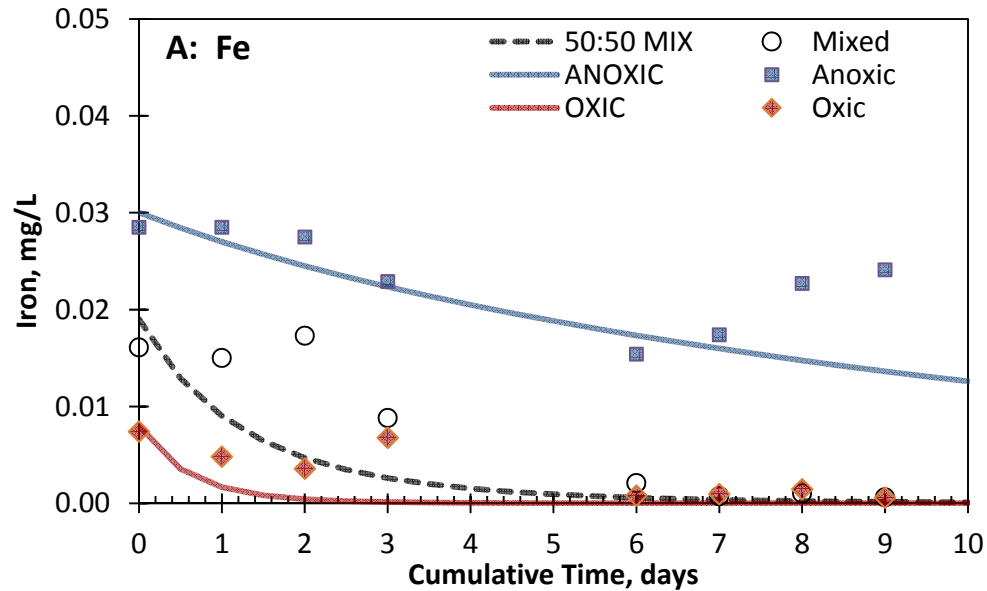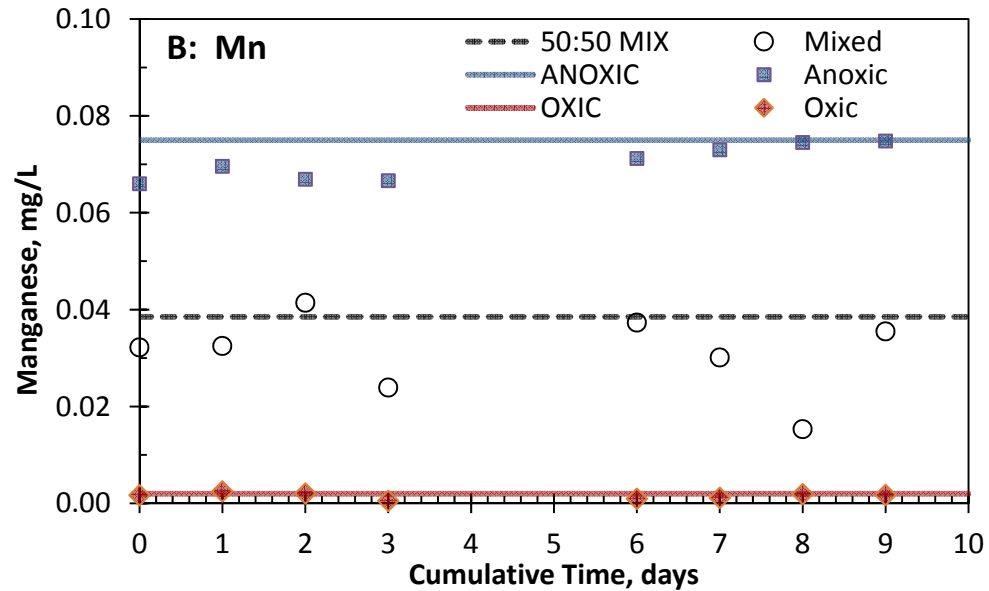

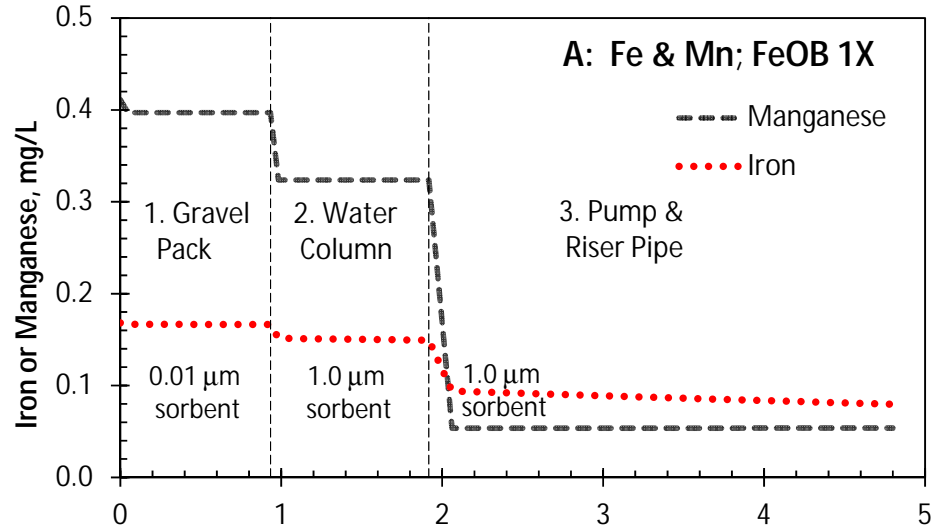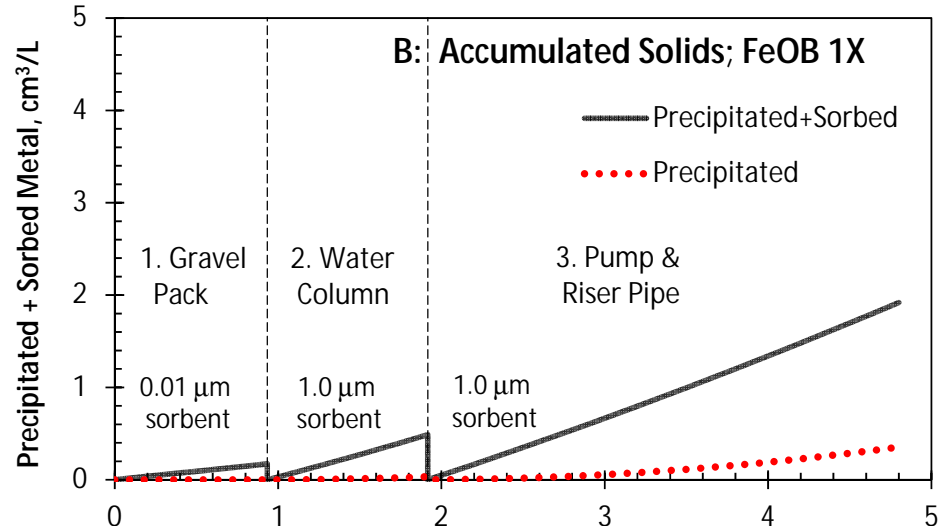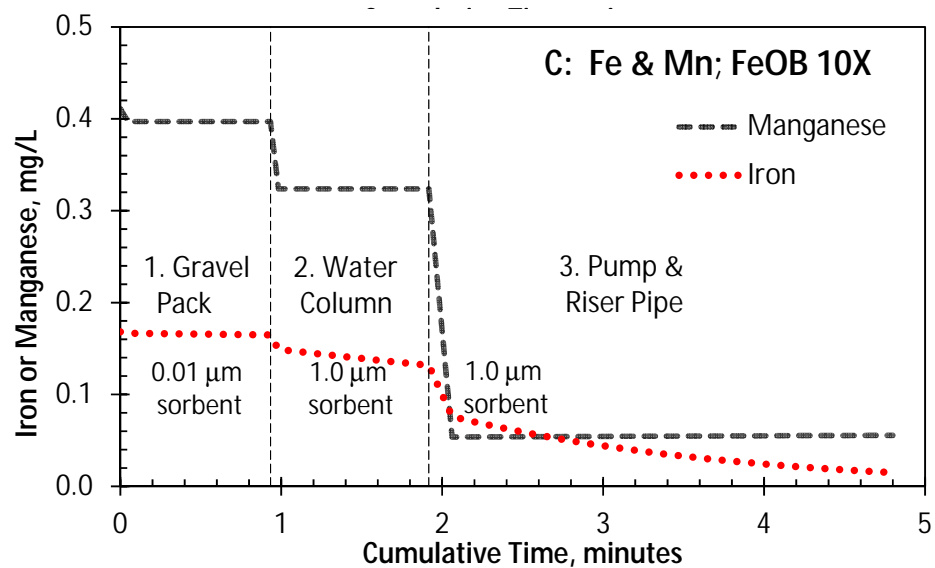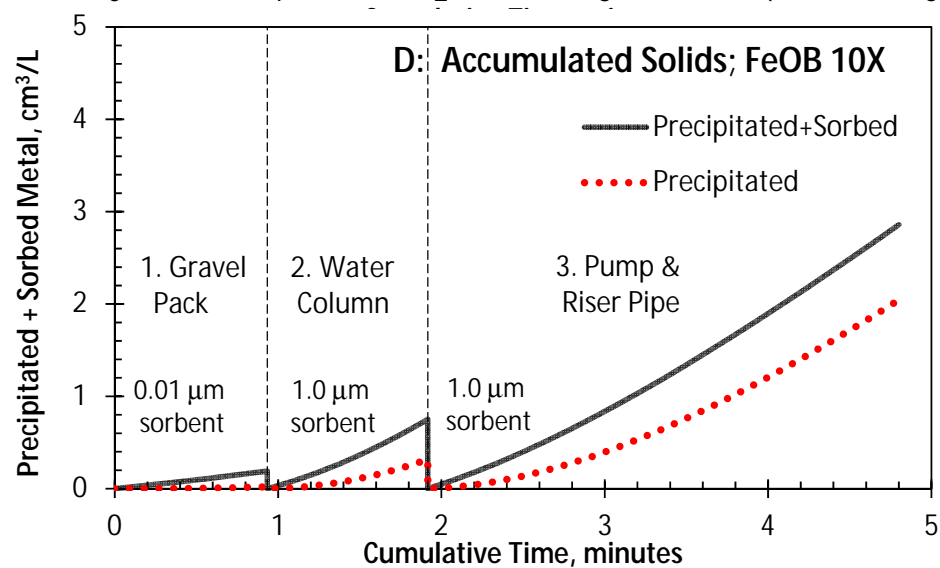

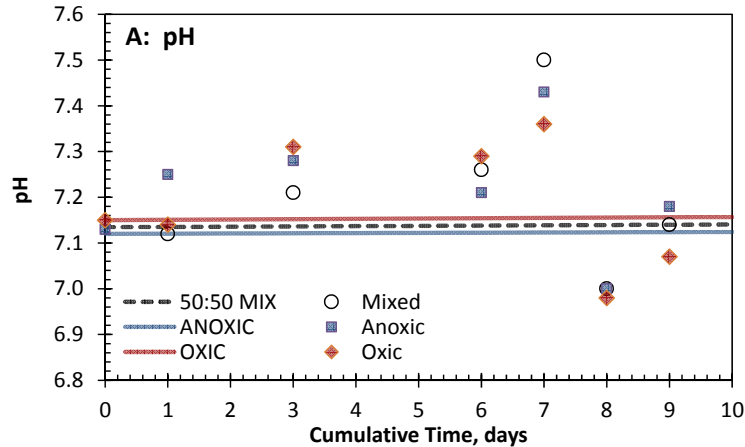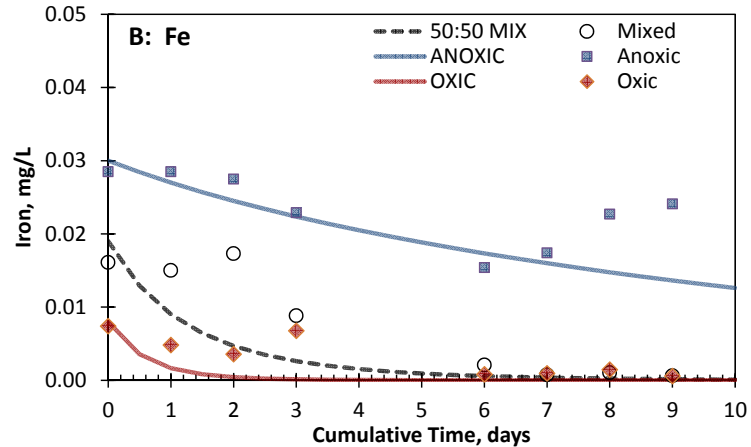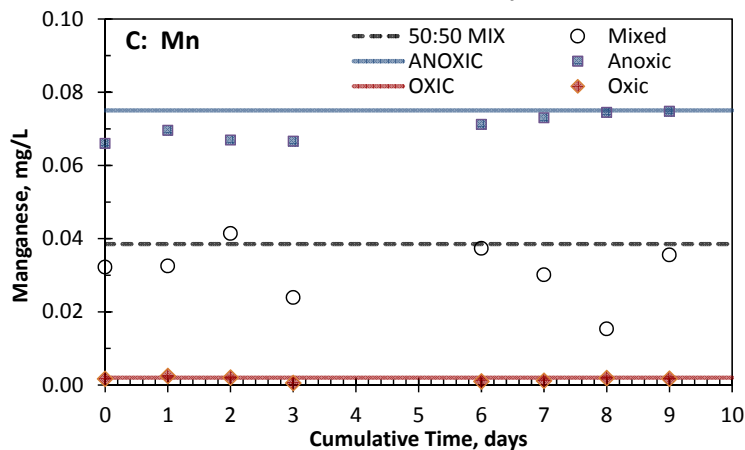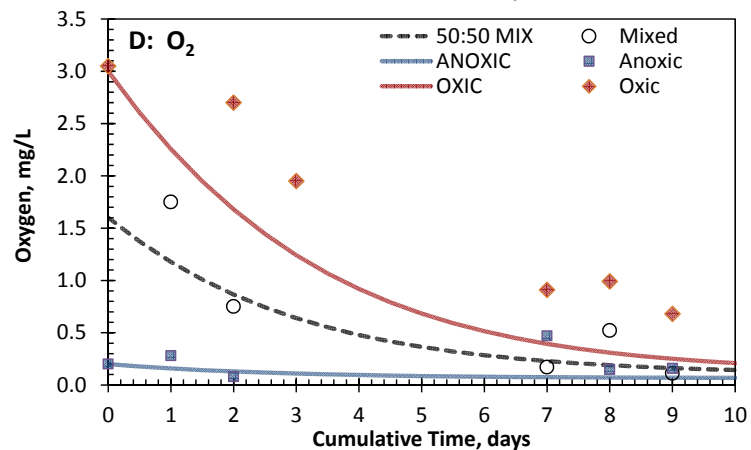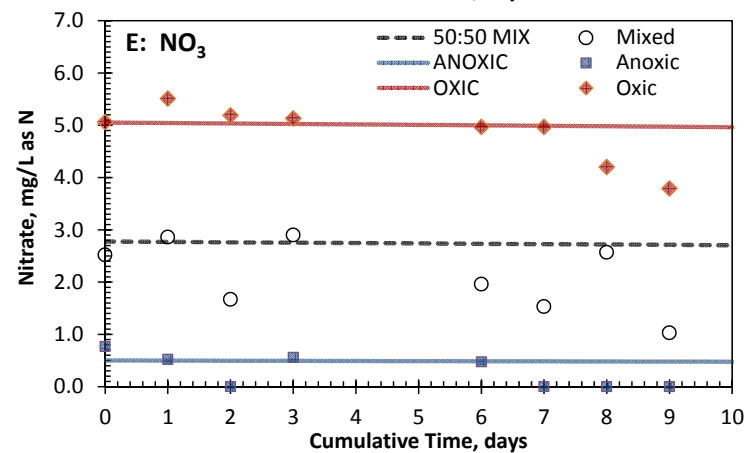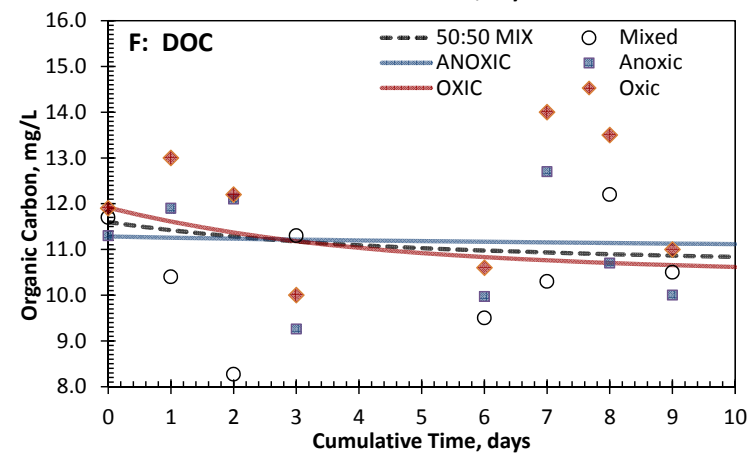

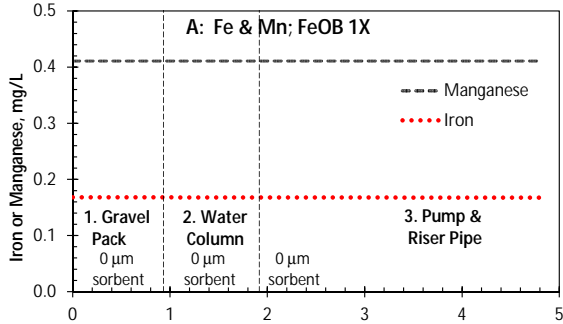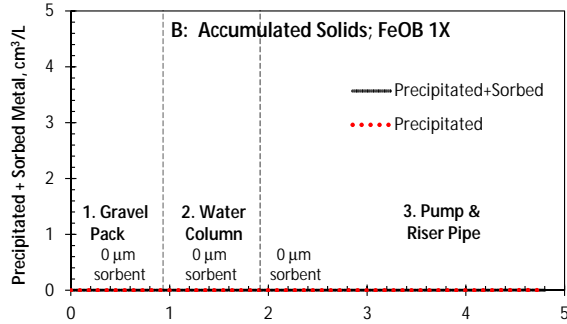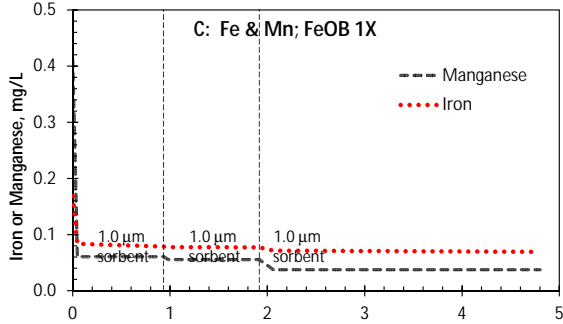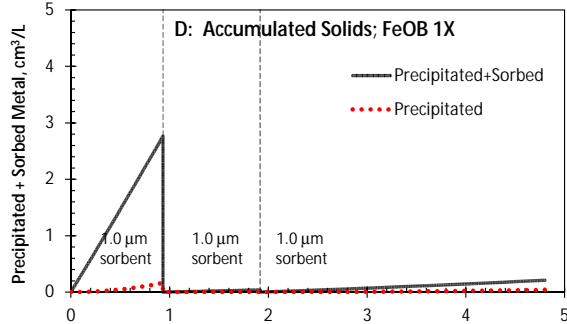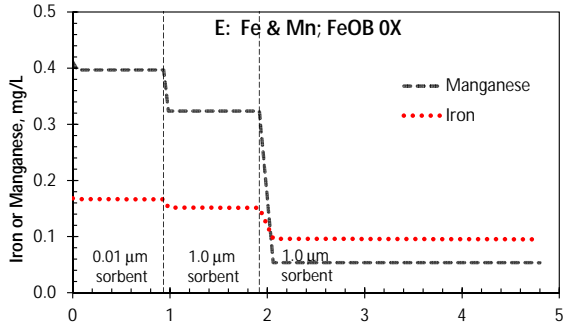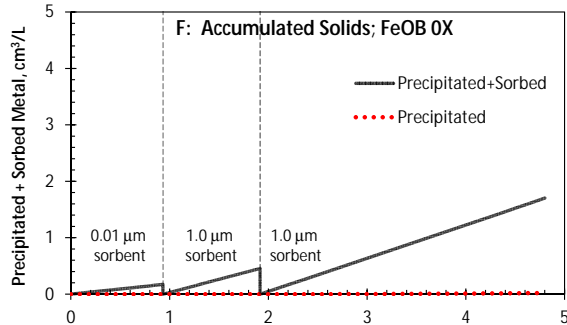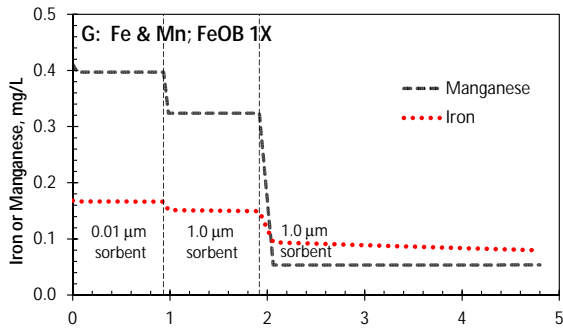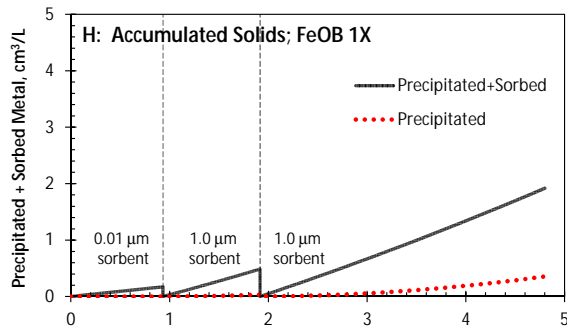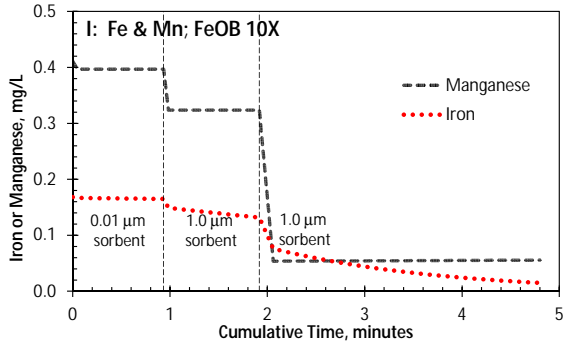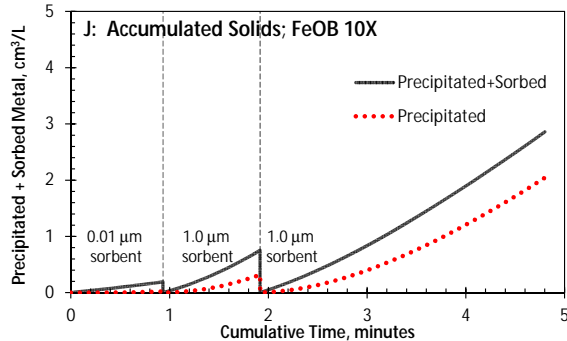

Supplement: Supplementary file 3 [file 15123386]
